# Supplementary material
Source: PubMed Central journal article supplement (PMC5825300)
Supplement: BPH-175-924-s001.pdf [file BPH-175-924-s001.pdf]

## Supplementary information

**Proton-independent activation of acid-sensing ion channels by alkaloid lindoldhamine from**

*Laurus nobilis*

**Dmitry I. Osmakov<sup>1,2,#</sup>, Sergey G. Koshelev<sup>1,#</sup>, Yaroslav A. Andreev<sup>1,2</sup>,**

**Maxim A. Dubinnyi<sup>1</sup>, Vadim S. Kublitski<sup>1</sup>, Roman G. Efremov<sup>1</sup>, Alexander I.**

**Sobolevsky<sup>3\*</sup>, Sergey A. Kozlov<sup>1\*</sup>**

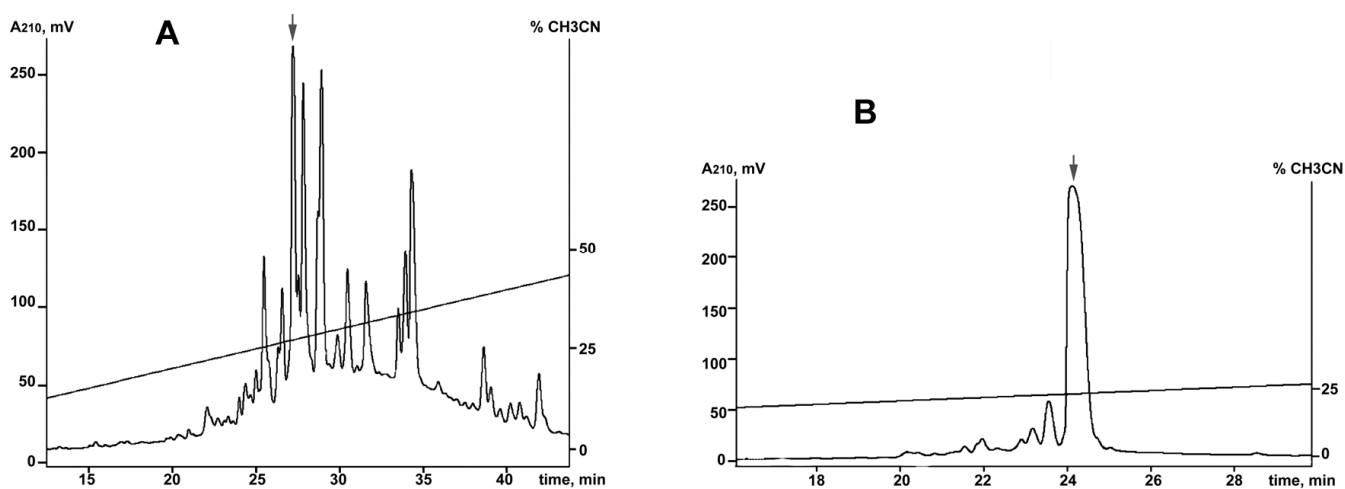

**Supplementary Figure 1.** Purification of LIN. *A*, The first separation stage of the acetic extract of *L. nobilis* leaves on a reverse-phase column LunaC18 (10x250mm) in 0.1% TFA with a flow rate 5 ml/min using a linear gradient of acetonitrile concentration. *B*, Final purification on a column VydacC18 (4.6x250mm) in 0.1% TFA with a flow rate of 1 ml/min using a linear gradient of acetonitrile concentration.

Fractions containing the active component are marked by an arrow.

| Atom | <sup>1</sup> H ppm (J Hz)                | <sup>13</sup> C( <sup>15</sup> N) ppm | NMR contacts <sup>a)</sup>                      | Atom   | <sup>1</sup> H ppm (J Hz)                | <sup>13</sup> C( <sup>15</sup> N) ppm | NMR contacts <sup>a)</sup>                 |
|------|------------------------------------------|---------------------------------------|-------------------------------------------------|--------|------------------------------------------|---------------------------------------|--------------------------------------------|
| α    | 3.233 dd(6.0;13.9)<br>3.064 dd(6.8;13.9) | 38.145                                | <u>1</u> ,8a,9, <b>10,14</b>                    | α'     | 3.314 dd(7.6,13.8)<br>3.167 dd(7.4,13.8) | 38.496                                | <u>1'</u> ,8a',9', <b>10'14'</b>           |
| 1    | 4.643 dd(6.0;6.8)                        | 55.20                                 | <u>a</u> ,3,4a, <b>8,8a,9,10,14</b>             | 1'     | 4.662 t(7.5)                             | 55.64                                 | <u>a'</u> ,3',4a', <b>8',8a',9',10'14'</b> |
| 2    | . b)                                     | <sup>15</sup> N 43.8                  | 4                                               | 2'     | .                                        | <sup>15</sup> N 43.8                  | 4'                                         |
| 3    | 3.452 m<br>3.388 m                       | 38.16                                 | <u>4</u> ,1,4a                                  | 3'     | 3.584 m<br>3.412 m                       | 38.392                                | <u>4'</u> ,1',4a'                          |
| 4    | 3.002 m<br>2.969 m                       | 23.71                                 | 2, <u>3</u> ,5,4a,8a                            | 4'     | 3.051 m                                  | 23.99                                 | 2', <u>3'</u> ,5',4a',8a'                  |
| 4a   | .                                        | 123.42                                | 1,3,4,8                                         | 4a'    | .                                        | 123.12                                | 1',3',4',8'                                |
| 5    | 6.648 s                                  | 111.60                                | 4,6,7,8a, <b>6OMe</b>                           | 5'     | 6.909 s                                  | 111.69                                | 4',6',7',8a', <b>6'OMe</b>                 |
| 6    | .                                        | 147.03                                | 5,8                                             | 6'     | .                                        | 147.21                                | 5',8'                                      |
| 6OMe | 3.657 s                                  | 55.21                                 | 6,5                                             | 6'OMe  | 3.867 s                                  | 55.47                                 | 6',5'                                      |
| 7    | .                                        | 142.71                                | 5,8                                             | 7'     | .                                        | 143.04                                | 5',8'                                      |
| 8    | 6.193 s                                  | 113.40                                | <b>a</b> ,1,4a,5,6,7                            | 8'     | 6.201 s                                  | 113.21                                | <b>a'</b> ,1',4a',6',7'                    |
| 8a   | .                                        | 122.37                                | a,1,4,5                                         | 8a'    | .                                        | 122.90                                | a',1',4',5'                                |
| 9    | .                                        | 127.66                                | a,1,2                                           | 9'     | .                                        | 129.73                                | a',1',11'13'                               |
| 10   | 6.449 s                                  | 121.51                                | <b>a</b> ,1, <u>11</u> ,12,14,<br><b>11'13'</b> | 10'14' | 7.133 d(8.3)                             | 130.78                                | <b>1'</b> , <b>a'</b> , <u>11'13'</u> ,12' |
| 11   | .                                        | 143.20                                | 13,10                                           | 11'13' | 6.841 d(8.3)                             | 117.49                                | <u>10'14'</u> ,9',10                       |
| 12   | .                                        | 146.09                                | 14,10                                           | 12'    | .                                        | 155.91                                | 10'14'                                     |
| 13   | 7.086 s                                  | 117.17                                | 9,11                                            |        |                                          |                                       |                                            |
| 14   | 7.083 s                                  | 125.83                                | <b>a</b> ,1,10,12                               |        |                                          |                                       |                                            |

**Supplementary Table 1.**

NMR chemical shifts (ppm), multiplicities (Hz) and NMR HMBC/ROESY/COSY contacts in LIN. Conditions: D<sub>2</sub>O, pH 3.0, 14°C, Bruker Avance III 600MHz. Atom numbering follows Fig. 1B.

<sup>a)</sup> Heavy atom number of corresponding NMR cross-peak outline HMBC contacts (*italic*), ROESY contacts (**bold**) and COSY ones (underlined)

<sup>b)</sup> Not applicable

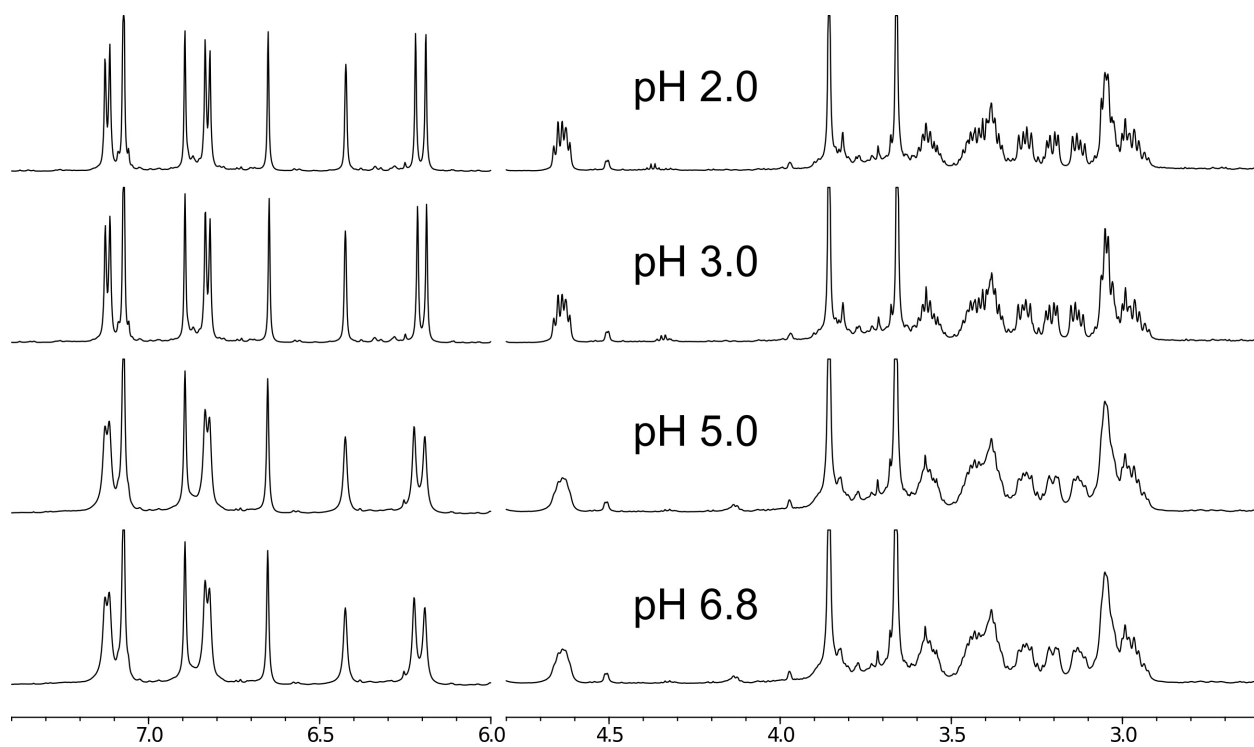

**Supplementary Figure 2.**

The  $^1\text{H}$  NMR spectra of LIN at different pH values ( $\text{D}_2\text{O}$ ,  $14^\circ\text{C}$ , 600 MHz). Absence of any observable chemical shift changes in  $^1\text{H}$  NMR and 2D  $^{13}\text{C}$ -HSQC/ $^{13}\text{C}$ -HMBC NMR spectra (data not shown) proves absence of ionogenic groups with pKa in range 1..8 in LIN.

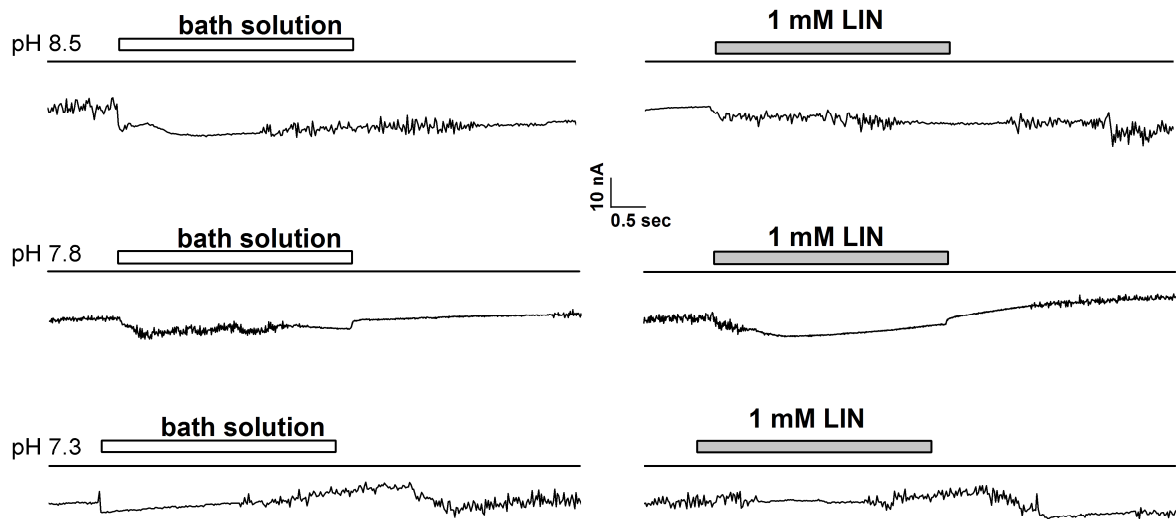

**Supplementary Figure 3. LIN application on uninjected oocytes.**

Whole-cell current traces recorded from oocytes held at pH 8.5, 7.8 and 7.3 in response to corresponding bath solution (left panel) and to 1 mM LIN (right panel).

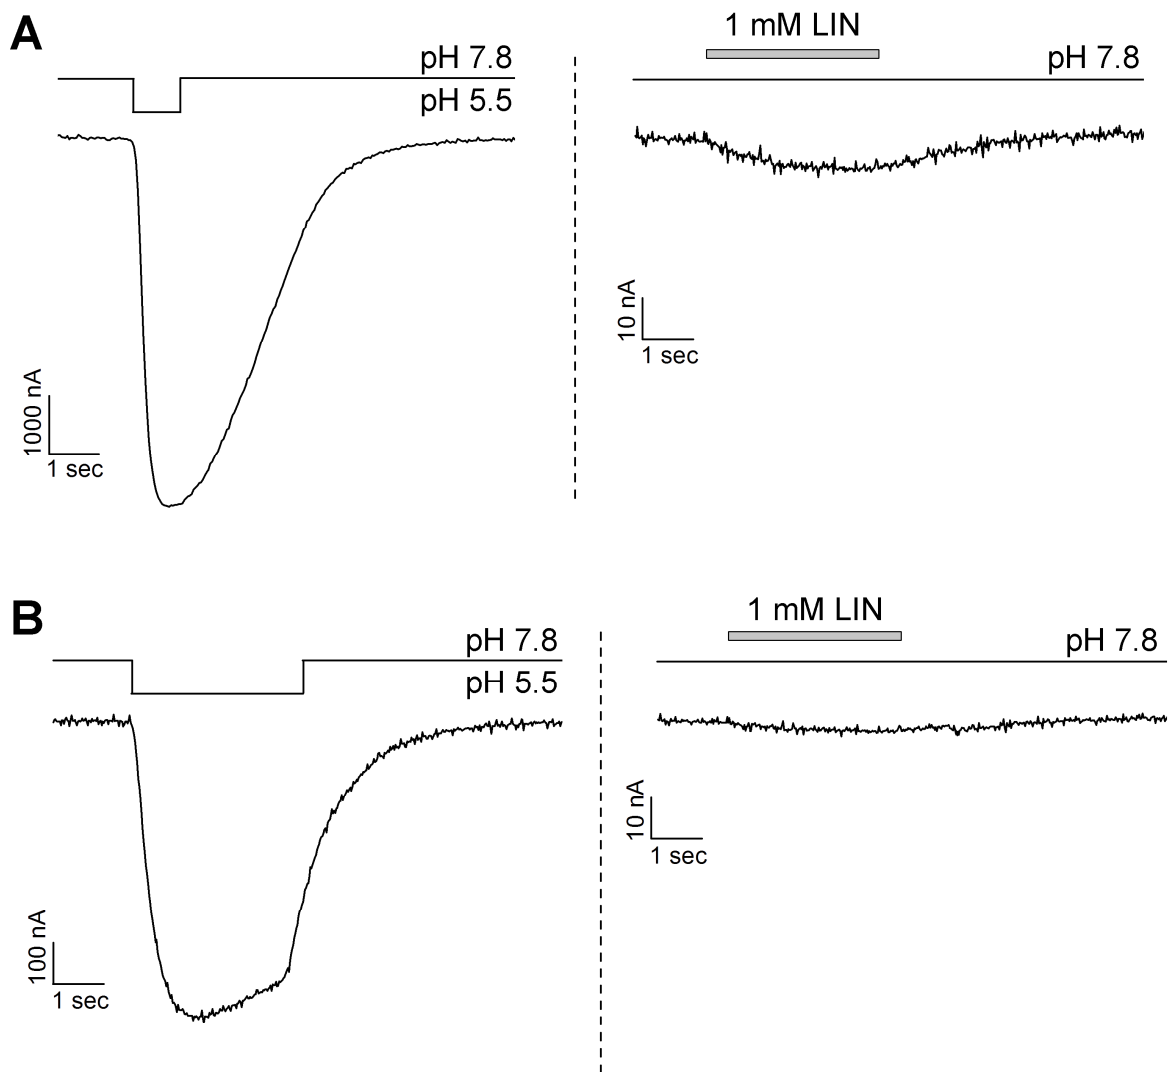

**Supplementary Figure 4. LIN application on rat ASIC1a and rat ASIC2a channels.**

(A) Whole-cell current traces recorded from rat ASIC1a channels held at pH 7.8 in response to pH 5.5 stimulus (left panel) and to 1 mM LIN (right panel). The mean of LIN-induced current was  $0.55 \pm 0.13\%$  of pH 5.5-induced current,  $n = 6$ . Data are mean  $\pm$  SEM.

(B) Whole-cell traces recorded from rat ASIC2a channels held at pH 7.8 in response to pH 5.5 stimulus (left panel) and to 1 mM LIN (right panel). The mean of LIN-induced current was  $0 \pm 0\%$  of pH 5.5-induced current,  $n = 5$ .
